# Supplementary material for: Association of Infants Exposed to Prenatal Zika Virus Infection With Their Clinical, Neurologic, and Developmental Status Evaluated via the General Movement Assessment Tool
Source: PubMed Central journal article supplement (PMC6431234; doi:10.1001/jamanetworkopen.2018.7235), 2019-01-18
Supplement: NIHMS1018435-supplement-Supplemental.pdf [file NIHMS1018435-supplement-Supplemental.pdf]

# 1 Supplemental Appendix

## 2 The General Movement Assessment

3 Since its introduction some 20 years ago,<sup>8</sup> GMA has been applied to study and clinically assess infants with acquired  
4 brain injury, or after neonatal surgery,<sup>26</sup> in the evaluation of newborns with intrauterine growth restriction, and  
5 infants who were prenatally exposed to adverse maternal health conditions or drug abuse.<sup>e.g.,8,10,11,26,30</sup> The GMA  
6 provides 98% sensitivity for the prediction of cerebral palsy (95% CI 74-100%),<sup>9-11</sup> and also identifies infants at high  
7 risk for (a) minor neurological dysfunction, (b) certain genetic and neurodevelopmental disorders with a diagnosis in  
8 or beyond toddlerhood (e.g., Rett syndrome, autism spectrum disorder), or (c) learning difficulties at school age).  
9 Summary estimates of its specificity are 91% (95% CI 83-93%).<sup>10</sup>

10  
11 GMA can be applied from birth onwards,<sup>9</sup> but its high predictive power primarily lies in the assessment of the  
12 fidgety movements, which is the age-specific general movement pattern of three- to five-month-old infants.  
13 Numerous studies and meta-analyses have confirmed the initial published findings,<sup>8</sup> i.e., that infants develop  
14 normally if their fidgety movements are normal, even if their clinical history may indicate a disposition to later  
15 neurological deficits. Conversely, almost all infants who never develop fidgety movements are at high risk for an  
16 adverse outcome.<sup>10,11,17,18</sup> Thus, GMA is one of the tools of choice when it comes to predicting neurological  
17 outcomes.

18  
19 The GMA is based on visual Gestalt perception of videoed age-specific normal and abnormal movement patterns  
20 with interrater reliabilities ranging from 0.88 to 0.92 (Kappa values).<sup>9,11</sup> During the postterm age of three to five  
21 months, GMs appear as fidgety movements, which are small movements of the neck, trunk, and limbs in all  
22 directions and of variable acceleration<sup>8,9</sup> indicating a normal neurological development (LR<sup>-</sup> = 0.04; 95% CI: 0.005  
23 to 0.27). Abnormal fidgety movements with exaggerated amplitude, speed and jerkiness may point to neurological  
24 deficits, but their predictive power is low (LR<sup>+</sup> = 5.1; 95% CI: 1.5 to 17).<sup>8</sup> It is the absence of fidgety movements  
25 that is strongly related to the development of severe neurological deficits (LR<sup>+</sup> = <51), most intensively studied as a  
26 predictor of cerebral palsy.<sup>8,11,19</sup>

27  
28 In addition to fidgety movements, we assessed in detail other movement patterns and postures specific for the age of  
29 three to five months. The detailed GMA, also called the “Assessment of Motor Repertoire at Three to Five Months  
30 of Age,”<sup>9, p. 26</sup> comprises the following five sub-categories: (i) temporal organization of fidgety movements, (ii) age-  
31 adequacy of motor repertoire, (iii) quality of movement patterns other than fidgety movements, (iv) posture, and (v)  
32 overall quality of the motor repertoire. It reveals a motor optimality score (MOS) with a maximum of 28 (best  
33 possible performance) and a minimum of five. An MOS from 25 to 28 is considered to be optimal; scores ≤24 are  
34 reduced.<sup>9</sup> The inter-observer reliability is high with intra-class correlation coefficients ranging from 0.80 to 0.94.<sup>8</sup>

## 35 Results (additional)

### 36 The motor optimality score, MOS

37 Neither country of origin nor ethnicity (defined by the parents of the child and the investigators) affected the MOS  
38 of the control infants: infants born in South America (median=26; IQR=24–26) did not differ from infants born in  
39 North America or Europe (median=26; IQR=24–28; p=0.505); Caucasian infants (median=26; IQR=24–28) did not  
40 differ from non-Caucasians (median=26; IQR=24–26; p=0.685). Overall, the median MOS of the control group was  
41 with 26 within the optimal range (Table 1). These results emphasised once again<sup>9</sup> that endogenously generated  
42 movement patterns are independent of ethnicity, environmental settings and care-giving procedures.

43  
44  
45 The number of normal movement patterns (co-occurring with fidgety movements) ranged from 2 to 14 (median 5) in  
46 control infants, from 0 to 10 (median 3) in the Rio de Janeiro cohort, and from 0 to 2 in infants with microcephaly  
47 (median 0; Table 1). The most frequently occurring normal movement patterns in control infants were fidgety  
48 movements (100%), foot-to-foot contact (62%), visual scanning (57%), smiling (38%), hand-to-mouth contact  
49 (36%), wiggling-oscillating arm movements (32%), hand-to-hand contact (32%), legs lift (32%), and kicking (30%).  
50 Each of these movement patterns occurred significantly less often in infants prenatally exposed to acute maternal  
51 infection with rash who did not develop microcephaly (p values ranging from 0.037 to 0.001). The few age-specific  
52 movement patterns observed in infants with microcephaly were smiling (14%), and foot-to-foot contact (6%) or  
53 side-to-side movements of the head (6%).

54 A small proportion of control infants exhibited a few abnormal movement patterns. Among those were long lasting  
55 and/or repetitive tongue protrusion (8%) and abnormal foot-to-foot contact (i.e. both feet frequently striking each  
56 other on the tibial side without any plantar contact; 5%). Abnormal tongue protrusion also occurred in 14 infants of  
57 the Rio de Janeiro cohort (18%) and in nine infants with microcephaly (26%). Apart from tongue protrusion, the  
58 most frequently occurring abnormal movement patterns in the Rio de Janeiro cohort were long-lasting wiggling-  
59 oscillating movements of arms, neck and/or legs (33%) and abnormal eye movements, such as strabismus or slow  
60 pursuit (9%). Abnormal eye movements were also seen in 24 infants with microcephaly (69%). In addition, they  
61 showed circular arm movements (46%), long lasting stiff head anteflexion (40%), en bloc trunk rotations (31%),  
62 long-lasting kicking (29%), and/or monotonous side-to-side movements of the head (26%). Ten infants (29%) with  
63 microcephaly were almost hypokinetic in the lower limbs, which also occurred in two infants (3%) of the Rio de  
64 Janeiro cohort who did not develop microcephaly.

65  
66 Seventy-five percent of all control infants had four normal postural patterns such as head in midline, symmetric  
67 body posture, absence of asymmetric tonic neck posture, and variable finger postures, whereas 75% of the infants  
68 from the Rio de Janeiro cohort had only three normal postural patterns (Tables 1 and 3). Infants with microcephaly  
69 had only one normal postural pattern.

70  
71 The majority of infants with microcephaly (86%) could not maintain the head in midline, whereas no difference  
72 regarding this item was observed between the Rio de Janeiro cohort and controls (29 vs. 19%; Table 3). Long-  
73 lasting extensions of arms and/or legs were also almost equally often observed in the Rio de Janeiro cohort and the  
74 controls. Long-lasting extension of the legs, however, occurred in 91% of infants with microcephaly ( $p < 0.001$ ). A  
75 persistent asymmetric tonic neck posture, hyperextension of the neck and/or trunk, and spreading of toes merely  
76 occurred in infants with microcephaly (Table 3). None of the infants with microcephaly had variable finger  
77 postures; 13 infants (37%) were constantly fisting and the remaining 22 infants (63%) had rarely occurring  
78 monotonous finger movements. External rotation and abduction of the hip hardly occurred in infants with  
79 microcephaly but was present in 26% of the Rio de Janeiro cohort. A cramped-synchronised movement character  
80 (i.e. stiff limb and trunk muscles contract almost simultaneously and then relax almost simultaneously)<sup>9</sup> occurred  
81 only in infants with microcephaly (19/35; 53%). A monotonous movement character occurred in all three groups; it  
82 was present in 27% of the control infants, in every second infant of the Rio de Janeiro cohort, and in almost all  
83 infants with microcephaly (Table 1). Tremulous movements occurred in only one infant of the Rio de Janeiro cohort  
84 and in 13 infants with microcephaly (37%). In any case the monotonous, jerky and/or stiff movement character  
85 observed in the control group did not correlate with the Bayley-III scores at 12 to 30 months as their scores were in  
86 the normal range. The described irritability and tremulousness<sup>e.g.,22,23</sup> in ZIKV-exposed non-microcephalic infants  
87 was not confirmed in our study. The explanation might be that previous observations referred mainly to neonates  
88 whereas we included three to five-month-olds.

89  
90 Only two of 35 infants showed normal foot-to-foot contact and normal side-to-side movements of the head; another  
91 five infants socially smiled. Apart from these few normal patterns, infants with microcephaly showed abnormal eye  
92 movements (strabismus, nystagmus), long lasting stiff head anteflexion, *en bloc* trunk rotations, circular arm  
93 movements, monotonous and long lasting (mainly unilateral) kicking or no leg movements at all; if the legs were not  
94 moving they were kept in full extension. A cramped-synchronised movement character was observed in every  
95 second infant with microcephaly. Such rigid movements with almost simultaneous contraction of at least two limbs  
96 and the trunk followed by an almost simultaneous relaxation is known to be highly predictive for severe spastic  
97 cerebral palsy,<sup>8</sup> especially if it persists beyond two months after term. Finally, none of the infants with microcephaly  
98 exhibited variable finger postures. This is in line with previous observations about the association between variable  
99 finger postures and a normal cognitive development.<sup>24</sup>
